# Supplementary material
Source: ML conference proceedings conference paper supplement (https://openaccess.thecvf.com/content/CVPR2021/html/Zhang_Neural_Architecture_Search_CVPR_2021_paper.html)
Supplement: Supplementary file 1 [file Zhang_Neural_Architecture_Search_CVPR_2021_supplemental.pdf]

# 1. Appendix

## 1.1. Architectures Searched in DARTS Search Space

In DARTS search space, we visualize all RLNAS architectures : searched on CIFAR-10 (Figure 1), ImageNet within 600M FLOPs constrain (Figure 2), ImageNet without FLOps constrain (Figure 3).

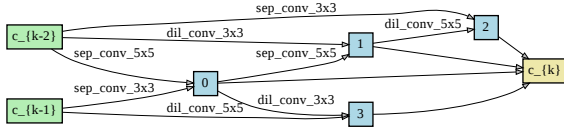

(a) normal cell

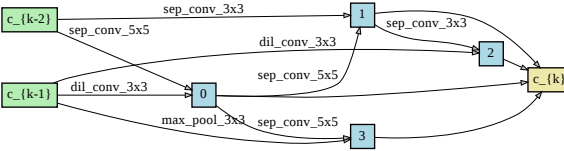

(b) reduce cell

Figure 1: The best architecture of RLNAS searched on CIFAR-10 dataset.

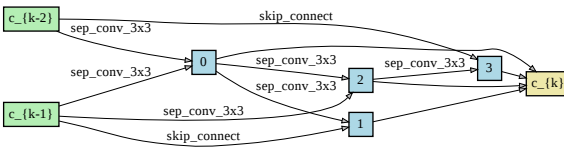

(a) normal cell

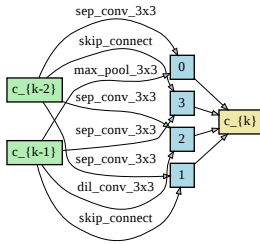

(b) reduce cell

Figure 2: The best Architecture of RLNAS searched on ImageNet dataset within 600M FLOPs constrain.

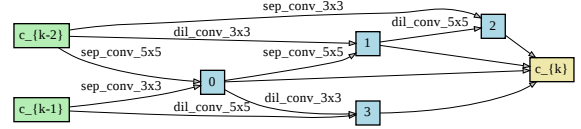

(a) normal cell

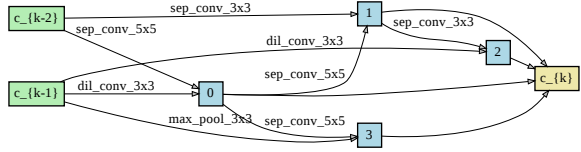

(b) reduce cell

Figure 3: The best architecture of RLNAS searched on ImageNet dataset without FLOPs constrain.

## 1.2. Architectures Searched in MobileNet-like Search Space

In MobileNet-like search space, we visualize the architecture searched on ImageNet (Figure 4).

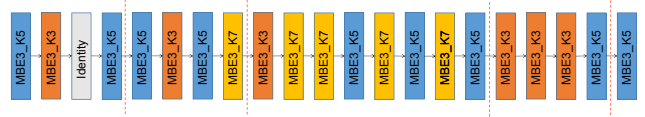

Figure 4: The best architecture of RLNAS searched on ImageNet dataset within 475M FLOPs constrain.

## 1.3. Comparison with UnNAS on NAS-Bench-201

We further conduct experiments on NA-Bench-201 to compare with UnNAS. We use the same pretext tasks on CIFAR-10 as UnNAS. Specifically, we leverage SPOS with pretext tasks to train supernet and the validation accuracy of pretext tasks is used as fitness to evolve architecture search. As Table 1 shows, RLNAS obtains architectures with higher test accuracy and lower accuracy variance.

| Method                         | CIFAR-10          |
|--------------------------------|-------------------|
|                                | test acc (%)      |
| UnNAS ( <i>rotation task</i> ) | 92.41±0.12        |
| UnNAS ( <i>color task</i> )    | 92.14±0.60        |
| UnNAS ( <i>jigsaw task</i> )   | 92.38±0.19        |
| RLNAS                          | <b>93.45±0.11</b> |

Table 1: Comparison with UnNAS on NAS-Bench-201.
